# Supplementary material
Source: PubMed Central journal article supplement (PMC4113315)
Supplement: NIHMS593574-supplement-02.pdf [file NIHMS593574-supplement-02.pdf]

Supplementary table 1. Ongoing primate genome projects

| <i>Common name</i>      | <i>Species name</i>           | <i>Status</i>                       | <i>Institution</i>                    | <i>Assembly</i>                                                                                                                                                               |
|-------------------------|-------------------------------|-------------------------------------|---------------------------------------|-------------------------------------------------------------------------------------------------------------------------------------------------------------------------------|
| African green monkey    | <i>Chlorocebus aethiops</i>   | Analysis in progress                | TGI and UCLA                          | <a href="http://genome.wustl.edu/projects/detail/vervet-reference-genome-project/">http://genome.wustl.edu/projects/detail/vervet-reference-genome-project/</a>               |
| Baboon                  | <i>Papio anubis</i>           | Annotation and analysis in progress | BCM-HGSC                              | <a href="https://www.hgsc.bcm.edu/non-human-primates/baboon-genome-project">https://www.hgsc.bcm.edu/non-human-primates/baboon-genome-project</a>                             |
| Black and white colobus | <i>Colobus angolensis</i>     | Sequencing in progress              | BCM-HGSC                              | <a href="https://www.hgsc.bcm.edu/non-human-primates">https://www.hgsc.bcm.edu/non-human-primates</a>                                                                         |
| Drill                   | <i>Mandrillus leucophaeus</i> | Sequencing in progress              | BCM-HGSC                              | <a href="https://www.hgsc.bcm.edu/non-human-primates">https://www.hgsc.bcm.edu/non-human-primates</a>                                                                         |
| Gibbon                  | <i>Nomascus leucogenys</i>    | Manuscript in preparation           | BCM-HGSC (in collaboration with OHSU) | <a href="http://rth.dk/ucsc/cgi-bin/hgGateway?hgsid=38884&amp;clade=other&amp;org=Gibbon">http://rth.dk/ucsc/cgi-bin/hgGateway?hgsid=38884&amp;clade=other&amp;org=Gibbon</a> |

|                 |                              |                                         |                                                        |                                                                                                                                                                                                                                                |
|-----------------|------------------------------|-----------------------------------------|--------------------------------------------------------|------------------------------------------------------------------------------------------------------------------------------------------------------------------------------------------------------------------------------------------------|
|                 |                              |                                         |                                                        | <a href="#">&amp;db=0</a><br><a href="#">[Au:OK?]</a>                                                                                                                                                                                          |
| Marmoset        | <i>Callithrix jacchus</i>    | Manuscript in review                    | BCM-HGSC and TGI                                       | <a href="http://genome.ucsc.edu/cgi-bin/hgGateway?hgsid=174521093&amp;clade=mammal&amp;org=Marmoset&amp;db=0">http://genome.ucsc.edu/cgi-bin/hgGateway?hgsid=174521093&amp;clade=mammal&amp;org=Marmoset&amp;db=0</a> <a href="#">[Au:OK?]</a> |
| Mouse lemur     | <i>Microcebus murinus</i>    | 2x Assembly complete; Draft in progress | 2x Sanger: Broad Draft: BCM-HGSC and Duke Lemur Center | <a href="http://rth.dk/ucsc/cgi-bin/hgGateway?db=micMur1">http://rth.dk/ucsc/cgi-bin/hgGateway?db=micMur1</a><br><a href="#">[Au:OK?]</a>                                                                                                      |
| Owl monkey      | <i>Aotus nancymaae</i>       | Sequencing approved                     | BCM-HGSC                                               | <a href="https://www.hgsc.bcm.edu/non-human-primates">https://www.hgsc.bcm.edu/non-human-primates</a>                                                                                                                                          |
| Pigtail macaque | <i>Macaca nemestrina</i>     | Assembly in progress                    | BCM-HGSC                                               | <a href="https://www.hgsc.bcm.edu/non-human-primates">https://www.hgsc.bcm.edu/non-human-primates</a>                                                                                                                                          |
| Sifaka          | <i>Propithecus coquereli</i> | Assembly in progress                    | BCM-HGSC and Duke Lemur Center                         | <a href="https://www.hgsc.bcm.edu/non-human-primates">https://www.hgsc.bcm.edu/non-human-primates</a>                                                                                                                                          |
| Sooty mangabey  | <i>Cercocebus atys</i>       | Assembly complete                       | BCM-HGSC and Emory                                     | <a href="https://www.hgsc.bcm.edu/non-human-primates">https://www.hgsc.bcm.edu/non-human-primates</a>                                                                                                                                          |

|                    |                                |                           |       |                                                                                                                                                                                                                               |
|--------------------|--------------------------------|---------------------------|-------|-------------------------------------------------------------------------------------------------------------------------------------------------------------------------------------------------------------------------------|
|                    |                                |                           |       | primates                                                                                                                                                                                                                      |
| Squirrel<br>monkey | <i>Saimiri<br/>boliviensis</i> | Assembled<br>and released | Broad | <a href="http://rth.dk/ucsc/cgi-bin/hgGateway?hgsid=38878&amp;clade=other&amp;org=Squirrel+monkey&amp;db=0">http://rth.dk/ucsc/cgi-bin/hgGateway?hgsid=38878&amp;clade=other&amp;org=Squirrel+monkey&amp;db=0</a><br>[Au:OK?] |

Broad, Broad Institute, Cambridge, MA, USA; Emory, Emory University, Atlanta, GA, USA; Baylor College of Medicine Human Genome Sequencing Center (BCM-HGSC), Houston, TX, USA; TGI: The Genome Institute, Washington University School of Medicine, St Louis, MO, USA; UCLA, University of California, Los Angeles, CA, USA.

**[Au: Highlighted references. For references that are particularly worth reading (5–10% of the total), please provide a single bold sentence that indicates the significance of the work.]**
